# Supplementary material
Source: publisher figshare collection journal article supplement (https://geolsoc.figshare.com/articles/dataset/_/3453638)
Supplement: Supplementary file 1 [file 1]

**B Supplementary data.** Summary of analytical results by U-Pb LAM-MC-ICP-MS zircons data.

**SAMPLE TOR-03-MT47 - Loncopué (38°07'15.52" S - 70°34'36.22" W)**

| Spot number | f(206)% | Th/U | 6/4 ratio | 7/6 ratio | 1s(%) | 7/5 ratio | 1s(%) | 6/8 ratio | 1s(%) | Rho  | 7/6 age | 1s(abs) | 7/5 age | 1s(abs) | 6/8 age | 1s(abs) | Conc (%) |
|-------------|---------|------|-----------|-----------|-------|-----------|-------|-----------|-------|------|---------|---------|---------|---------|---------|---------|----------|
| 03_MT47.dat | 0.07    | 0.20 | 24271     | 0.05441   | 0.9   | 0.4224    | 1.4   | 0.05631   | 1.0   | 0.74 | 388.0   | 2.1     | 357.8   | 4.2     | 353.2   | 3.6     | 91.0     |
| 04_MT47.dat | 0.15    | 0.29 | 15978     | 0.04887   | 2.1   | 0.1869    | 2.6   | 0.02773   | 1.5   | 0.58 | 141.7   | 4.9     | 173.9   | 4.1     | 176.3   | 2.6     | 124.4    |
| 05_MT47.dat | 0.53    | 0.99 | 3479      | 0.05433   | 2.9   | 0.2293    | 3.2   | 0.03061   | 1.2   | 0.37 | 384.9   | 6.6     | 209.6   | 6.0     | 194.4   | 2.3     | 50.5     |
| 06_MT47.dat | 0.14    | 1.26 | 13466     | 0.04967   | 1.2   | 0.2080    | 1.5   | 0.03037   | 1.0   | 0.80 | 179.8   | 2.7     | 191.9   | 2.7     | 192.9   | 1.8     | 107.3    |
| 09_MT47.dat | 0.08    | 0.76 | 22102     | 0.05010   | 0.9   | 0.2462    | 1.3   | 0.03564   | 1.0   | 0.73 | 199.5   | 2.0     | 223.5   | 2.7     | 225.8   | 2.2     | 113.1    |
| 10_MT47.dat | 0.13    | 1.18 | 15982     | 0.04990   | 1.3   | 0.2059    | 1.8   | 0.02993   | 1.2   | 0.65 | 190.3   | 3.0     | 190.1   | 3.0     | 190.1   | 2.2     | 99.9     |
| 12_MT47.dat | 0.12    | 1.11 | 14737     | 0.05167   | 1.8   | 0.2138    | 2.1   | 0.03001   | 0.9   | 0.68 | 270.9   | 4.2     | 196.8   | 3.7     | 190.6   | 1.8     | 70.4     |
| 17_MT47.dat | 0.13    | 0.43 | 14248     | 0.05011   | 1.1   | 0.1914    | 1.9   | 0.02771   | 1.5   | 0.80 | 200.3   | 2.6     | 177.9   | 3.1     | 176.2   | 2.6     | 88.0     |
| 18_MT47.dat | 0.02    | 0.96 | 128618    | 0.04992   | 0.6   | 0.1567    | 1.1   | 0.02278   | 0.9   | 0.79 | 191.1   | 1.5     | 147.9   | 1.5     | 145.2   | 1.3     | 76.0     |
| 20_MT47.dat | 0.16    | 0.28 | 11502     | 0.06103   | 5.4   | 0.3766    | 5.6   | 0.04476   | 1.1   | 0.36 | 640.4   | 11.7    | 324.6   | 15.4    | 282.3   | 3.0     | 44.1     |
| 23_MT47.dat | 0.31    | 1.56 | 5958      | 0.05154   | 1.6   | 0.2145    | 1.8   | 0.03019   | 0.9   | 0.48 | 265.1   | 3.6     | 197.4   | 3.2     | 191.7   | 1.7     | 72.3     |
| 24_MT47.dat | 0.08    | 0.67 | 38612     | 0.05084   | 1.2   | 0.3117    | 1.8   | 0.04447   | 1.3   | 0.72 | 233.7   | 2.8     | 275.5   | 4.2     | 280.5   | 3.5     | 120.0    |
| 25_MT47.dat | 0.06    | 0.65 | 31089     | 0.05345   | 0.9   | 0.1878    | 1.2   | 0.02548   | 0.8   | 0.67 | 347.9   | 1.9     | 174.8   | 1.9     | 162.2   | 1.3     | 46.6     |
| 26_MT47.dat | 0.21    | 0.35 | 8634      | 0.05267   | 2.9   | 0.3413    | 3.2   | 0.04700   | 1.3   | 0.66 | 314.8   | 6.6     | 298.2   | 8.2     | 296.1   | 3.8     | 94.1     |
| 29_MT47.dat | 0.05    | 0.41 | 39142     | 0.05145   | 0.7   | 0.2980    | 1.1   | 0.04201   | 0.8   | 0.73 | 260.9   | 1.6     | 264.8   | 2.5     | 265.3   | 2.1     | 101.7    |
| 30_MT47.dat | 0.03    | 0.27 | 96528     | 0.05600   | 1.4   | 0.8649    | 3.4   | 0.11202   | 3.1   | 0.91 | 452.2   | 3.1     | 632.8   | 15.8    | 684.5   | 19.9    | 151.4    |
| 31_MT47.dat | 0.11    | 0.49 | 16068     | 0.05106   | 1.5   | 0.1767    | 1.6   | 0.02509   | 0.7   | 0.41 | 243.5   | 3.4     | 165.2   | 2.5     | 159.8   | 1.2     | 65.6     |
| 35_MT47.dat | 0.09    | 0.16 | 19887     | 0.05459   | 2.4   | 0.2820    | 3.0   | 0.03747   | 1.8   | 0.60 | 395.3   | 5.4     | 252.2   | 6.7     | 237.1   | 4.2     | 60.0     |
| 37_MT47.dat | 0.39    | 0.45 | 4702      | 0.05640   | 1.4   | 0.2666    | 2.2   | 0.03429   | 1.7   | 0.76 | 468.1   | 3.2     | 240.0   | 4.8     | 217.3   | 3.6     | 46.4     |
| 38_MT47.dat | 0.15    | 0.27 | 12562     | 0.05264   | 4.9   | 0.2017    | 6.0   | 0.02779   | 3.5   | 0.82 | 313.5   | 11.0    | 186.6   | 10.2    | 176.7   | 6.1     | 56.4     |
| 41_MT47.dat | 0.03    | 0.04 | 61433     | 0.05875   | 1.0   | 0.5804    | 2.5   | 0.07164   | 2.2   | 0.91 | 557.9   | 2.3     | 464.7   | 9.2     | 446.0   | 9.6     | 79.9     |
| 42_MT47.dat | 0.08    | 0.79 | 20426     | 0.05044   | 1.1   | 0.2296    | 2.4   | 0.03302   | 2.2   | 0.88 | 215.2   | 2.6     | 209.9   | 4.6     | 209.4   | 4.4     | 97.3     |
| 43_MT47.dat | 0.19    | 0.37 | 9427      | 0.05393   | 1.2   | 0.3740    | 2.0   | 0.05029   | 1.6   | 0.80 | 368.2   | 2.6     | 322.6   | 5.4     | 316.3   | 4.8     | 85.9     |
| 44_MT47.dat | 0.04    | 0.45 | 41879     | 0.04923   | 1.1   | 0.1719    | 1.8   | 0.02532   | 1.4   | 0.90 | 158.9   | 2.6     | 161.0   | 2.7     | 161.2   | 2.3     | 101.4    |
| 47_MT47.dat | 0.06    | 0.52 | 33222     | 0.05031   | 0.7   | 0.2022    | 1.3   | 0.02915   | 1.1   | 0.86 | 209.2   | 1.5     | 187.0   | 2.3     | 185.2   | 2.1     | 88.5     |
| 48_MT47.dat | 0.07    | 0.55 | 36596     | 0.04798   | 2.1   | 0.1545    | 2.4   | 0.02335   | 1.2   | 0.46 | 98.2    | 5.1     | 145.9   | 3.3     | 148.8   | 1.7     | 151.6    |
| 50_MT47.dat | 0.05    | 0.23 | 39202     | 0.04933   | 1.9   | 0.1705    | 2.4   | 0.02507   | 1.6   | 0.84 | 163.7   | 4.3     | 159.9   | 3.6     | 159.6   | 2.5     | 97.5     |
| 56_MT47.dat | 0.05    | 0.28 | 36519     | 0.05046   | 0.7   | 0.2008    | 1.2   | 0.02886   | 1.0   | 0.80 | 216.1   | 1.6     | 185.8   | 2.0     | 183.4   | 1.8     | 84.9     |
| 57_MT47.dat | 0.07    | 0.66 | 24724     | 0.04979   | 0.7   | 0.1956    | 1.1   | 0.02850   | 0.9   | 0.79 | 185.1   | 1.5     | 181.4   | 1.9     | 181.2   | 1.6     | 97.9     |

|             |      |      |       |         |     |        |     |         |     |      |       |      |       |      |       |     |       |
|-------------|------|------|-------|---------|-----|--------|-----|---------|-----|------|-------|------|-------|------|-------|-----|-------|
| 58_MT47.dat | 0.08 | 0.83 | 24221 | 0.05306 | 1.2 | 0.2508 | 1.7 | 0.03429 | 1.2 | 0.87 | 331.3 | 2.8  | 227.3 | 3.5  | 217.3 | 2.6 | 65.6  |
| 61_MT47.dat | 0.08 | 0.35 | 24204 | 0.04947 | 1.0 | 0.1769 | 1.6 | 0.02594 | 1.3 | 0.78 | 170.0 | 2.3  | 165.4 | 2.5  | 165.1 | 2.1 | 97.1  |
| 62_MT47.dat | 0.08 | 0.32 | 36602 | 0.05051 | 1.0 | 0.1681 | 1.4 | 0.02414 | 0.9 | 0.62 | 218.5 | 2.4  | 157.8 | 2.0  | 153.8 | 1.3 | 70.4  |
| 63_MT47.dat | 0.19 | 0.77 | 9518  | 0.04905 | 2.2 | 0.2213 | 2.4 | 0.03272 | 0.9 | 0.35 | 150.2 | 5.1  | 203.0 | 4.4  | 207.6 | 1.8 | 138.2 |
| 64_MT47.dat | 0.90 | 0.44 | 2043  | 0.05685 | 7.2 | 0.2163 | 7.6 | 0.02760 | 2.4 | 0.55 | 485.8 | 15.8 | 198.9 | 13.7 | 175.5 | 4.2 | 36.1  |
| 68_MT47.dat | 0.14 | 0.30 | 16790 | 0.05194 | 1.7 | 0.1900 | 2.0 | 0.02653 | 1.0 | 0.51 | 282.6 | 3.8  | 176.6 | 3.2  | 168.8 | 1.7 | 59.7  |
| 69_MT47.dat | 0.03 | 0.31 | 50917 | 0.06662 | 0.7 | 1.1771 | 1.5 | 0.12815 | 1.3 | 0.87 | 825.8 | 1.5  | 790.0 | 8.2  | 777.3 | 9.6 | 94.1  |

### Rejected analysis

|             |      |      |       |         |     |        |     |         |     |      |        |      |       |      |       |      |        |
|-------------|------|------|-------|---------|-----|--------|-----|---------|-----|------|--------|------|-------|------|-------|------|--------|
| 11_MT47.dat | 0.23 | 0.71 | 7993  | 0.04491 | 2.2 | 0.1459 | 2.5 | 0.02356 | 1.1 | 0.43 | -60.7  | 5.5  | 138.3 | 3.2  | 150.1 | 1.6  | -247.3 |
| 19_MT47.dat | 0.15 | 0.38 | 12661 | 0.04448 | 2.9 | 0.1487 | 3.0 | 0.02424 | 0.9 | 0.28 | -83.9  | 7.0  | 140.7 | 3.9  | 154.4 | 1.4  | -184.0 |
| 32_MT47.dat | 0.14 | 0.43 | 13497 | 0.03856 | 9.3 | 0.1319 | 9.4 | 0.02481 | 1.3 | 0.27 | -446.7 | 24.5 | 125.8 | 11.1 | 158.0 | 2.1  | -35.4  |
| 36_MT47.dat | 0.21 | 0.35 | 16568 | 0.04335 | 5.5 | 0.2626 | 6.0 | 0.04394 | 2.4 | 0.39 | -147.4 | 13.7 | 236.8 | 12.7 | 277.2 | 6.5  | -188.1 |
| 49_MT47.dat | 0.23 | 0.37 | 7717  | 0.04730 | 5.3 | 0.5572 | 6.0 | 0.08543 | 2.7 | 0.45 | 64.5   | 12.7 | 449.7 | 21.7 | 528.5 | 13.7 | 819.3  |
| 55_MT47.dat | 0.04 | 0.32 | 43091 | 0.04920 | 1.0 | 0.3009 | 1.4 | 0.04435 | 1.0 | 0.71 | 157.6  | 2.3  | 267.1 | 3.4  | 279.7 | 2.8  | 177.5  |
| 67_MT47.dat | 0.11 | 0.49 | 15946 | 0.04831 | 2.0 | 0.3447 | 2.6 | 0.05176 | 1.5 | 0.60 | 114.2  | 4.8  | 300.7 | 6.7  | 325.3 | 4.9  | 284.7  |
| 70_MT47.dat | 0.07 | 0.35 | 25262 | 0.04664 | 4.3 | 0.1472 | 4.5 | 0.02289 | 1.4 | 0.53 | 31.0   | 10.2 | 139.5 | 5.8  | 145.9 | 2.0  | 470.9  |

### SAMPLE TOR-05-MT46 - Río Neuquén (37°22'41.29"S - 70°27'29.90"W)

| Spot number | f(206)% | Th/U | 6/4 ratio | 7/6 ratio | 1s(%) | 7/5 ratio | 1s(%) | 6/8 ratio | 1s(%) | Rho  | 7/6 age | 1s(abs) | 7/5 age | 1s(abs) | 6/8 age | 1s(abs) | Conc (%) |
|-------------|---------|------|-----------|-----------|-------|-----------|-------|-----------|-------|------|---------|---------|---------|---------|---------|---------|----------|
| 03_MT46     | 0.08    | 0.73 | 24222     | 0.04853   | 1.1   | 0.1575    | 1.5   | 0.02353   | 1.0   | 0.65 | 125.2   | 2.6     | 148.5   | 2.0     | 150.0   | 1.4     | 119.7    |
| 04_MT46     | 0.27    | 0.54 | 6131      | 0.04907   | 2.2   | 0.1545    | 2.5   | 0.02283   | 1.2   | 0.47 | 151.2   | 5.1     | 145.9   | 3.4     | 145.5   | 1.7     | 96.3     |
| 05_MT46     | 0.16    | 0.43 | 11737     | 0.04849   | 2.3   | 0.1553    | 2.4   | 0.02322   | 0.9   | 0.36 | 123.5   | 5.3     | 146.5   | 3.3     | 148.0   | 1.4     | 119.8    |
| 06_MT46     | 0.06    | 0.81 | 29858     | 0.05029   | 1.4   | 0.1893    | 1.6   | 0.02729   | 0.8   | 0.69 | 208.5   | 3.3     | 176.0   | 2.7     | 173.6   | 1.4     | 83.3     |
| 09_MT46     | 0.05    | 0.57 | 37693     | 0.04900   | 0.7   | 0.1535    | 1.0   | 0.02272   | 0.7   | 0.66 | 148.0   | 1.8     | 145.0   | 1.4     | 144.9   | 1.1     | 97.8     |
| 10_MT46     | 0.03    | 0.83 | 75800     | 0.04945   | 0.8   | 0.1637    | 1.0   | 0.02402   | 0.6   | 0.59 | 169.0   | 1.8     | 154.0   | 1.5     | 153.0   | 1.0     | 90.5     |
| 12_MT46     | 0.04    | 0.55 | 41254     | 0.04965   | 1.6   | 0.1549    | 1.7   | 0.02263   | 0.7   | 0.62 | 178.7   | 3.6     | 146.3   | 2.3     | 144.3   | 1.1     | 80.7     |
| 15_MT46     | 0.02    | 0.65 | 80727     | 0.04900   | 0.6   | 0.1547    | 1.2   | 0.02290   | 1.0   | 0.85 | 147.8   | 1.4     | 146.1   | 1.6     | 146.0   | 1.5     | 98.7     |
| 17_MT46     | 0.10    | 0.59 | 18459     | 0.04955   | 0.9   | 0.1551    | 1.3   | 0.02270   | 0.9   | 0.66 | 173.8   | 2.1     | 146.4   | 1.7     | 144.7   | 1.2     | 83.2     |
| 18_MT46     | 0.05    | 0.63 | 34581     | 0.04944   | 1.6   | 0.1472    | 1.9   | 0.02159   | 1.0   | 0.74 | 168.5   | 3.8     | 139.4   | 2.5     | 137.7   | 1.4     | 81.7     |
| 21_MT46     | 0.03    | 0.91 | 56146     | 0.04980   | 0.7   | 0.1838    | 1.1   | 0.02677   | 0.9   | 0.77 | 185.8   | 1.5     | 171.3   | 1.7     | 170.3   | 1.4     | 91.7     |
| 23_MT46     | 0.07    | 0.44 | 24986     | 0.04828   | 0.7   | 0.1493    | 1.2   | 0.02243   | 0.9   | 0.79 | 112.9   | 1.6     | 141.3   | 1.5     | 143.0   | 1.3     | 126.6    |
| 24_MT46     | 0.20    | 0.46 | 9259      | 0.05209   | 2.8   | 0.1865    | 3.0   | 0.02596   | 1.1   | 0.60 | 289.5   | 6.4     | 173.6   | 4.8     | 165.2   | 1.8     | 57.1     |
| 29_MT46     | 0.11    | 0.59 | 17034     | 0.05176   | 1.0   | 0.2398    | 1.4   | 0.03360   | 0.9   | 0.62 | 274.9   | 2.4     | 218.3   | 2.7     | 213.0   | 1.8     | 77.5     |

|         |      |      |        |         |     |        |     |         |     |      |       |     |       |     |       |     |       |
|---------|------|------|--------|---------|-----|--------|-----|---------|-----|------|-------|-----|-------|-----|-------|-----|-------|
| 30_MT46 | 0.06 | 0.48 | 36882  | 0.04894 | 0.8 | 0.1525 | 1.4 | 0.02261 | 1.1 | 0.77 | 144.8 | 2.0 | 144.1 | 1.8 | 144.1 | 1.5 | 99.5  |
| 31_MT46 | 0.02 | 0.58 | 122326 | 0.04886 | 0.5 | 0.1506 | 1.2 | 0.02236 | 1.1 | 0.90 | 141.0 | 1.2 | 142.5 | 1.6 | 142.5 | 1.6 | 101.1 |
| 32_MT46 | 0.11 | 0.26 | 16649  | 0.04941 | 2.1 | 0.1568 | 2.4 | 0.02302 | 1.1 | 0.71 | 167.1 | 4.8 | 147.9 | 3.3 | 146.7 | 1.7 | 87.8  |
| 41_MT46 | 0.15 | 0.33 | 12064  | 0.05012 | 1.7 | 0.1665 | 1.8 | 0.02409 | 0.6 | 0.30 | 200.7 | 4.0 | 156.4 | 2.6 | 153.5 | 0.9 | 76.4  |
| 42_MT46 | 0.10 | 0.38 | 19904  | 0.05012 | 0.9 | 0.1681 | 1.2 | 0.02432 | 0.7 | 0.57 | 200.7 | 2.1 | 157.8 | 1.7 | 154.9 | 1.1 | 77.2  |
| 43_MT46 | 0.10 | 0.29 | 18764  | 0.04945 | 1.1 | 0.1529 | 1.5 | 0.02243 | 1.0 | 0.66 | 169.2 | 2.5 | 144.5 | 2.0 | 143.0 | 1.4 | 84.5  |
| 44_MT46 | 0.03 | 0.34 | 56515  | 0.04969 | 2.5 | 0.1554 | 2.7 | 0.02269 | 1.1 | 0.63 | 180.3 | 5.8 | 146.7 | 3.7 | 144.6 | 1.6 | 80.2  |
| 47_MT46 | 0.10 | 0.46 | 18438  | 0.05170 | 1.2 | 0.1659 | 1.8 | 0.02327 | 1.3 | 0.74 | 272.2 | 2.7 | 155.9 | 2.6 | 148.3 | 2.0 | 54.5  |
| 48_MT46 | 0.08 | 0.42 | 23651  | 0.04866 | 0.9 | 0.1488 | 1.5 | 0.02218 | 1.2 | 0.79 | 131.5 | 2.1 | 140.9 | 1.9 | 141.4 | 1.7 | 107.5 |
| 49_MT46 | 0.10 | 0.46 | 18981  | 0.05010 | 0.9 | 0.1511 | 1.2 | 0.02187 | 0.8 | 0.63 | 199.8 | 2.0 | 142.9 | 1.6 | 139.5 | 1.1 | 69.8  |
| 50_MT46 | 0.07 | 0.55 | 26789  | 0.04918 | 1.6 | 0.1490 | 2.0 | 0.02197 | 1.1 | 0.77 | 156.5 | 3.8 | 141.0 | 2.6 | 140.1 | 1.5 | 89.5  |
| 56_MT46 | 0.05 | 0.71 | 37152  | 0.04936 | 1.4 | 0.1549 | 1.7 | 0.02276 | 0.9 | 0.75 | 164.9 | 3.2 | 146.2 | 2.3 | 145.1 | 1.3 | 88.0  |
| 59_MT46 | 0.08 | 0.41 | 21797  | 0.05024 | 0.9 | 0.1495 | 1.1 | 0.02158 | 0.7 | 0.55 | 206.0 | 2.1 | 141.5 | 1.5 | 137.6 | 0.9 | 66.8  |
| 60_MT46 | 0.10 | 0.56 | 18446  | 0.05103 | 0.9 | 0.1594 | 1.2 | 0.02266 | 0.8 | 0.65 | 242.1 | 2.1 | 150.2 | 1.7 | 144.4 | 1.2 | 59.6  |
| 61_MT46 | 0.06 | 0.64 | 33017  | 0.04955 | 0.7 | 0.1699 | 1.1 | 0.02487 | 0.9 | 0.75 | 173.9 | 1.7 | 159.3 | 1.6 | 158.3 | 1.3 | 91.1  |
| 62_MT46 | 0.11 | 0.40 | 16825  | 0.04864 | 2.6 | 0.1484 | 2.7 | 0.02213 | 0.7 | 0.44 | 130.5 | 6.2 | 140.5 | 3.6 | 141.1 | 1.0 | 108.2 |

#### Rejected analysis

|         |       |      |       |         |     |        |     |         |     |      |        |     |       |      |       |     |        |
|---------|-------|------|-------|---------|-----|--------|-----|---------|-----|------|--------|-----|-------|------|-------|-----|--------|
| 11_MT46 | 0.10  | 0.41 | 18726 | 0.04541 | 2.5 | 0.1667 | 2.7 | 0.02663 | 0.9 | 0.30 | -33.4  | 6.1 | 156.6 | 3.9  | 169.4 | 1.4 | -507.2 |
| 16_MT46 | 0.40  | 0.36 | 6035  | 0.04691 | 2.3 | 0.1469 | 2.6 | 0.02271 | 1.1 | 0.40 | 44.7   | 5.5 | 139.2 | 3.3  | 144.8 | 1.5 | 323.6  |
| 22_MT46 | 0.05  | 0.85 | 69616 | 0.04281 | 3.1 | 0.1482 | 3.5 | 0.02511 | 1.8 | 0.49 | -178.6 | 7.6 | 140.4 | 4.6  | 159.9 | 2.8 | -89.5  |
| 53_MT46 | 1.67  | 0.31 | 1103  | 0.07885 | 3.1 | 0.2978 | 3.4 | 0.02739 | 1.2 | 0.34 | 1168.3 | 6.2 | 264.7 | 7.8  | 174.2 | 2.0 | 14.9   |
| 54_MT46 | 0.26  | 0.60 | 7341  | 0.04278 | 3.7 | 0.1384 | 3.8 | 0.02347 | 0.9 | 0.23 | -180.5 | 9.2 | 131.6 | 4.7  | 149.5 | 1.4 | -82.9  |
| 55_MT46 | 19.10 | 0.44 | 96    | 0.32381 | 2.6 | 1.6583 | 3.2 | 0.03714 | 1.8 | 0.56 | 3588.0 | 4.0 | 992.7 | 20.2 | 235.1 | 4.1 | 6.6    |

#### SAMPLE TOR-06-MT45 - Puerta Curaco (37°17'58.12"S - 69°53'24.27"W)

| Spot number | f(206)% | Th/U | 6/4 ratio | 7/6 ratio | 1s(%) | 7/5 ratio | 1s(%) | 6/8 ratio | 1s(%) | Rho  | 7/6 age | 1s(abs) | 7/5 age | 1s(abs) | 6/8 age | 1s(abs) | Conc (%) |
|-------------|---------|------|-----------|-----------|-------|-----------|-------|-----------|-------|------|---------|---------|---------|---------|---------|---------|----------|
| 03_MT45_01  | 0.34    | 0.3  | 5414      | 0.05165   | 0.9   | 0.306     | 1.3   | 0.04297   | 0.9   | 0.68 | 270.1   | 2.1     | 271.1   | 3.1     | 271.2   | 2.4     | 100.4    |
| 04_MT45_02  | 15.01   | 0.41 | 80        | 0.05098   | 2.1   | 0.1802    | 2.4   | 0.02564   | 1.2   | 0.47 | 239.9   | 4.8     | 168.2   | 3.7     | 163.2   | 1.9     | 68.0     |
| 05_MT45_03  | 2.64    | 0.44 | 698       | 0.05211   | 2     | 0.2017    | 2.8   | 0.02807   | 1.9   | 0.68 | 290.3   | 4.6     | 186.6   | 4.7     | 178.5   | 3.3     | 61.5     |
| 11_MT45_05  | 0.08    | 0.15 | 24069     | 0.04832   | 1     | 0.1606    | 1.4   | 0.02411   | 1     | 0.71 | 114.9   | 2.3     | 151.3   | 2       | 153.6   | 1.6     | 133.7    |
| 12_MT45_07  | 0.56    | 0.31 | 5065      | 0.05206   | 1.7   | 0.217     | 2     | 0.03024   | 1.2   | 0.56 | 287.8   | 3.8     | 199.4   | 3.7     | 192     | 2.2     | 66.7     |
| 14_MT45_10  | 0.94    | 0.27 | 1966      | 0.05032   | 2.9   | 0.1668    | 3.3   | 0.02404   | 1.6   | 0.47 | 210     | 6.8     | 156.6   | 4.8     | 153.1   | 2.4     | 72.9     |
| 14_MT45_10  | 0.07    | 0.33 | 27568     | 0.04904   | 1.8   | 0.2708    | 2.4   | 0.04005   | 1.6   | 0.73 | 149.9   | 4.2     | 243.4   | 5.2     | 253.2   | 3.9     | 168.9    |

|                          |      |      |       |         |      |        |      |         |      |      |        |      |        |      |        |      |        |
|--------------------------|------|------|-------|---------|------|--------|------|---------|------|------|--------|------|--------|------|--------|------|--------|
| 17_MT45_11               | 0.06 | 0.11 | 28408 | 0.0491  | 0.9  | 0.1825 | 1.3  | 0.02696 | 0.9  | 0.68 | 152.8  | 2.1  | 170.2  | 2    | 171.5  | 1.5  | 112.2  |
| 18_MT45_12               | 0.4  | 0.13 | 7300  | 0.04373 | 1.8  | 0.1411 | 2    | 0.02341 | 1    | 0.48 | -126.1 | 4.4  | 134.1  | 2.6  | 149.2  | 1.5  | -118.3 |
| 19_MT45_13               | 1.17 | 0.28 | 1578  | 0.04741 | 2.7  | 0.1485 | 3    | 0.02271 | 1.3  | 0.42 | 69.9   | 6.5  | 140.6  | 4    | 144.8  | 1.9  | 207.2  |
| 20_MT45_14               | 0.45 | 0.37 | 4055  | 0.04819 | 3.5  | 0.1883 | 3.8  | 0.02834 | 1.5  | 0.57 | 108.5  | 8.3  | 175.1  | 6.2  | 180.1  | 2.7  | 166.1  |
| 23_MT45_15               | 0.62 | 0.58 | 2975  | 0.05077 | 2.5  | 0.2171 | 2.7  | 0.03101 | 1.2  | 0.41 | 230.5  | 5.7  | 199.5  | 4.9  | 196.9  | 2.3  | 85.4   |
| 24_MT45_16               | 0.61 | 0.3  | 3670  | 0.04844 | 2.1  | 0.1665 | 2.4  | 0.02493 | 1.2  | 0.47 | 120.6  | 5.0  | 156.3  | 3.5  | 158.7  | 1.8  | 131.6  |
| 25_MT45_17               | 0.18 | 0.39 | 10324 | 0.04723 | 1.3  | 0.1453 | 1.9  | 0.02231 | 1.4  | 0.73 | 61     | 3.0  | 137.7  | 2.4  | 142.2  | 2    | 233.1  |
| 26_MT45_18               | 0.4  | 0.27 | 4605  | 0.04838 | 3.3  | 0.1792 | 3.6  | 0.02686 | 1.5  | 0.59 | 117.9  | 7.8  | 167.4  | 5.6  | 170.9  | 2.5  | 144.9  |
| 29_MT45_19               | 0.29 | 0.18 | 6391  | 0.0494  | 1.5  | 0.1824 | 1.7  | 0.02677 | 0.8  | 0.45 | 166.8  | 3.6  | 170.1  | 2.7  | 170.3  | 1.4  | 102.1  |
| 30_MT45_20               | 0.37 | 0.33 | 14164 | 0.05038 | 2.4  | 0.1834 | 2.7  | 0.0264  | 1.1  | 0.41 | 212.6  | 5.6  | 171    | 4.2  | 168    | 1.9  | 79.0   |
| 31_MT45_21               | 0.07 | 0.12 | 26698 | 0.05131 | 1.1  | 0.2987 | 1.6  | 0.04223 | 1.2  | 0.71 | 254.8  | 2.6  | 265.4  | 3.8  | 266.6  | 3    | 104.7  |
| 32_MT45_22               | 0.22 | 0.53 | 8518  | 0.04843 | 2.6  | 0.1518 | 3.1  | 0.02273 | 1.7  | 0.68 | 120.5  | 6.2  | 143.5  | 4.1  | 144.9  | 2.4  | 120.3  |
| 37_MT45_23               | 0.21 | 0.39 | 8804  | 0.04644 | 1.5  | 0.1771 | 2.5  | 0.02766 | 2    | 0.8  | 20.6   | 3.7  | 165.6  | 3.9  | 175.9  | 3.5  | 854.9  |
| 38_MT45_24.              | 0.7  | 0.34 | 3031  | 0.05151 | 2.5  | 0.2143 | 2.7  | 0.03018 | 1.1  | 0.39 | 263.7  | 5.8  | 197.2  | 4.9  | 191.7  | 2.1  | 72.7   |
| 39_MT45_25               | 0.1  | 0.16 | 17905 | 0.05263 | 1.3  | 0.3858 | 1.8  | 0.05316 | 1.3  | 0.7  | 313    | 2.9  | 331.3  | 5    | 333.9  | 4.1  | 106.7  |
| 40_MT45_26               | 0.32 | 0.14 | 5768  | 0.04835 | 3    | 0.1854 | 3.3  | 0.02782 | 1.5  | 0.62 | 116.2  | 7.0  | 172.7  | 5.3  | 176.9  | 2.7  | 152.2  |
| 43_MT45_SN               | 0.03 | 0.09 | 62424 | 0.05296 | 0.9  | 0.4056 | 2.3  | 0.05555 | 2.1  | 0.92 | 326.9  | 2.0  | 345.7  | 6.7  | 348.5  | 7.2  | 106.6  |
| 44_MT45_27               | 0.11 | 0.27 | 14361 | 0.05053 | 1.2  | 0.1995 | 1.5  | 0.02864 | 1    | 0.61 | 219.6  | 2.8  | 184.7  | 2.6  | 182    | 1.7  | 82.9   |
| 46_MT45_29               | 0.15 | 0.24 | 12728 | 0.04794 | 2.9  | 0.1583 | 3.4  | 0.02395 | 1.7  | 0.66 | 96.3   | 7.0  | 149.2  | 4.7  | 152.6  | 2.5  | 158.4  |
| 49_MT45_30               | 0.11 | 0.23 | 16716 | 0.04844 | 1.2  | 0.1587 | 1.5  | 0.02375 | 1    | 0.65 | 120.9  | 2.7  | 149.5  | 2.1  | 151.3  | 1.5  | 125.2  |
| 50_MT45_SN               | 0.11 | 0.13 | 13477 | 0.05111 | 1.1  | 0.3081 | 1.5  | 0.04373 | 1    | 0.65 | 245.8  | 2.6  | 272.7  | 3.7  | 275.9  | 2.8  | 112.2  |
| 51_MT45_SN               | 0.31 | 0.19 | 6026  | 0.04717 | 1.5  | 0.1452 | 1.9  | 0.02233 | 1.2  | 0.62 | 57.9   | 3.6  | 137.7  | 2.5  | 142.3  | 1.7  | 246.0  |
| 52_MT45_SN               | 0.05 | 0.19 | 30127 | 0.17134 | 1.5  | 9.1666 | 2.1  | 0.38802 | 1.5  | 0.73 | 2570.7 | 2.4  | 2354.8 | 19.1 | 2113.6 | 27   | 82.2   |
| 55_MT45_SN               | 0.13 | 0.3  | 14371 | 0.04967 | 1.1  | 0.1661 | 1.3  | 0.02426 | 0.8  | 0.55 | 179.7  | 2.5  | 156    | 1.9  | 154.5  | 1.2  | 86.0   |
| 56_MT45_SN.              | 0.5  | 0.35 | 5024  | 0.04795 | 1.5  | 0.1833 | 1.8  | 0.02772 | 1    | 0.53 | 96.8   | 3.6  | 170.9  | 2.9  | 176.3  | 1.8  | 182.1  |
| 57_MT45_SN               | 0.14 | 0.3  | 13141 | 0.04865 | 1.6  | 0.1903 | 2.2  | 0.02837 | 1.5  | 0.68 | 130.8  | 3.8  | 176.9  | 3.6  | 180.4  | 2.8  | 137.9  |
| 58_MT45_SN               | 0.12 | 0.21 | 15042 | 0.04693 | 2.1  | 0.1512 | 2.7  | 0.02337 | 1.7  | 0.72 | 45.9   | 5.1  | 143    | 3.6  | 148.9  | 2.5  | 324.4  |
| <b>Rejected analysis</b> |      |      |       |         |      |        |      |         |      |      |        |      |        |      |        |      |        |
| 06_MT45_04               | 1.17 | 0.27 | 1593  | 0.05076 | 1.6  | 0.0926 | 2.6  | 0.01324 | 2.1  | 0.83 | 229.8  | 3.6  | 90     | 2.3  | 84.8   | 1.8  | 36.9   |
| 45_MT45_28               | 0.14 | 0.24 | 12728 | 0.08238 | 13.2 | 0.4611 | 18.6 | 0.04059 | 13.2 | 0.71 | 1254.6 | 25.8 | 385    | 59.7 | 256.5  | 33.1 | 20.5   |
