# Supplementary material
Source: publisher figshare collection journal article supplement (https://geolsoc.figshare.com/articles/dataset/_/3453638)
Supplement: Supplementary file 2 [file 1]

**Table: Values of the sandstone compositional framework**

|               | Folk et al. (1970) (Fig. 5) and Dickinson et al 1983 (Fig. 10a) |       |       |       | Folk et al 1970 and Dickinson et al. (1983) (Fig. 10b) |       |       |       |
|---------------|-----------------------------------------------------------------|-------|-------|-------|--------------------------------------------------------|-------|-------|-------|
|               | Qt                                                              | Ft    | Lt    | Total | Qm                                                     | Ft    | Lt+Qp | Total |
| <b>TOR-10</b> | 14.85                                                           | 13.69 | 71.46 | 100   | 6.50                                                   | 13.69 | 79.81 | 100   |
| <b>TOR-09</b> | 30.89                                                           | 23.31 | 45.80 | 100   | 21.68                                                  | 23.31 | 55.01 | 100   |
| <b>TOR-07</b> | 21.43                                                           | 22.05 | 56.52 | 100   | 18.94                                                  | 22.05 | 59.01 | 100   |
| <b>TOR-05</b> | 4.80                                                            | 44.53 | 50.67 | 100   | 4.27                                                   | 44.53 | 51.20 | 100   |
| <b>TOR-03</b> | 24.31                                                           | 30.77 | 44.92 | 100   | 19.08                                                  | 30.77 | 50.15 | 100   |

**Table: Criteria for textural subdivision of volcanic grains are those of Dickinson (1970) and Ingersol (1983). r.f.: rock fragment**

|                                              |      |      |       |      |      |
|----------------------------------------------|------|------|-------|------|------|
| Calcite replacement on K-feldspar            | 0    | 0.2  | 13.5  | 0.25 | 2.2  |
| K-feldspar (single crystals)                 | 11.2 | 4    | 0     | 7.25 | 8.4  |
| K-feldspar in volcanic r.f.                  | 0.4  | 0.2  | 0.25  | 0.5  | 0.6  |
| Plagioclase (single crystals)                | 4.6  | 5.4  | 11    | 7.75 | 20.6 |
| Plagioclase in volcanic r.f.                 | 1    | 2    | 0.25  | 2    | 1.6  |
| Altered r.f.                                 | 0.2  | 0    | 5.25  | 7.25 | 5.8  |
| Methamorphic r.f                             | 2.4  | 6.4  | 0     | 2.25 | 0.2  |
| Other lithics r.f                            | 0.2  | 0.4  | 0     | 0    | 0    |
| Plutonic r.f.                                | 5.2  | 0    | 0     | 0.25 | 0    |
| Volcanic lithic with felsic granular texture | 7.4  | 7.4  | 19.75 | 15.5 | 9.2  |
| Volcanic lithic with lathwork texture        | 0    | 3.2  | 0.75  | 3    | 1.8  |
| Volcanic lithic with microlithic texture     | 1.2  | 11.4 | 6     | 8.75 | 16.4 |
| Volcanic lithic with felsic seriate texture  | 13   | 22.6 | 1     | 3.5  | 0.2  |
| Volcanic lithic with vitric texture          | 2.8  | 5.8  | 0     | 2.5  | 0.2  |
| Sedimentary r.f.                             | 0.6  | 0.8  | 1.5   | 1.75 | 1    |
| Pseudomatrix                                 | 0.8  | 3.6  | 2.25  | 0.75 | 3.2  |
| Opaque minerals                              | 0.2  | 0.4  | 4     | 0.5  | 1    |
| Porosity                                     | 4    | 0    | 0     | 0    | 0    |
| Micas (single crystals)                      | 0    | 0.4  | 1.25  | 0    | 0    |
| Calcareous cement                            | 11.4 | 7    | 3.5   | 11.5 | 16   |
| Clay cements                                 | 10.6 | 6    | 9     | 7.5  | 8    |
| Zeolitic cement                              | 0    | 0    | 1     | 0    | 0    |
|                                              | 100  | 100  | 100   | 100  | 100  |
